# Supplementary material
Source: PubMed Central journal article supplement (PMC8319110)
Supplement: NIHMS1700545-supplement-1.pdf [file NIHMS1700545-supplement-1.pdf]

## Supplemental Appendix

### Table of Contents

|                                                                                                                                                                                                                           |    |
|---------------------------------------------------------------------------------------------------------------------------------------------------------------------------------------------------------------------------|----|
| Supplementary Tables .....                                                                                                                                                                                                | 2  |
| Table S1a. Baseline and On-Trial Physiologic Measurements, Risk Factors, and Medications by Listed Status. ....                                                                                                           | 2  |
| Table S1b. Baseline and On-Trial Physiologic Measurements, Risk Factors, and Medications by Listed Status and treatment strategy.....                                                                                     | 4  |
| Table S2. Adjusted <sup>a</sup> hazard ratios for the invasive versus conservative strategy by renal transplant candidacy status estimated from Cox proportional hazards models of the component secondary outcomes. .... | 6  |
| Supplementary Figures .....                                                                                                                                                                                               | 7  |
| Figure S1a. Not listed and listed flow diagram .....                                                                                                                                                                      | 7  |
| Figure S1b. Cardiac Catheterization and Revascularization Rates by Kidney Transplant Listing Status* .....                                                                                                                | 8  |
| Figure S2. Reasons for Coronary Angiography and Revascularization at 3 Years in the Conservative Group of Listed Patients (n=100) .....                                                                                   | 9  |
| Figure S3. Forest Plot of Interaction between Listing status and Primary and Secondary outcomes.....                                                                                                                      | 10 |
| ISCHEMIA-CKD Trial Committee Members and Key Personnel .....                                                                                                                                                              | 11 |
| ISCHEMIA-CKD Trial Site Personnel .....                                                                                                                                                                                   | 14 |

## Supplementary Tables

Table S1a. Baseline and On-Trial Physiologic Measurements, Risk Factors, and Medications by Listed Status.

|                                             | All participants (n = 777) |                 |               |                 |
|---------------------------------------------|----------------------------|-----------------|---------------|-----------------|
|                                             | Baseline                   |                 | Last visit    |                 |
|                                             | Not Listed                 | Listed          | Not Listed    | Listed          |
| <b>Variables</b>                            | (n=583) <sup>1</sup>       | (n=194)         | (n=583)       | (n=194)         |
| Systolic BP <140 mm Hg                      | 320/583 (55%)              | 109/193 (56%)   | 337/491 (69%) | 113/165 (68%)   |
| LDL cholesterol <70 mg/dl                   | 185/554 (33%)              | 69/173 (40%)    | 228/457 (50%) | 70/146 (48%)    |
| Not smoking                                 | 511/583 (88%)              | 182/194 (94%) * | 431/474 (91%) | 149/156 (96%)   |
| <b>Medications</b>                          |                            |                 |               |                 |
| Aspirin or aspirin alternative              | 471/552 (85%)              | 145/188 (77%) * | 409/469 (87%) | 139/158 (88%)   |
| Clopidogrel                                 | 148/583 (25%)              | 27/193 (14%) *  | 149/498 (30%) | 26/166 (16%) *  |
| Anticoagulant                               | 69/572 (12%)               | 10/191 (5%) *   | 54/496 (11%)  | 14/165 (8%)     |
| Statins                                     | 485/583 (83%)              | 144/193 (75%) * | 442/498 (89%) | 124/166 (75%) * |
| High-intensity statin                       | 157/580 (27%)              | 46/193 (24%)    | 191/498 (38%) | 62/166 (37%)    |
| Ezetimibe                                   | 19/583 (3%)                | 8/193 (4%)      | 109/498 (22%) | 13/166 (8%) *   |
| ACE inhibitor / ARB                         | 281/583 (48%)              | 89/193 (46%)    | 213/498 (43%) | 70/166 (42%)    |
| <b>Adherence to Medications<sup>2</sup></b> | 348/561 (62%)              | 131/186 (70%) * | 336/483 (70%) | 133/159 (84%) * |

---

Notes: ACE= angiotensin converting enzyme; ARB= angiotensin receptor blockers; BP= blood pressure; CON= conservative; INV= invasive; LDL= low density lipoprotein. Aspirin alternative denotes P2Y12 inhibitor. Antiplatelet denotes aspirin or P2Y12 inhibitor.

<sup>1</sup>For each individual OMT goal, the last visit is defined as the latest visit (at least 12 months after randomization) where the goal is evaluable. If the latest visit where the goal is evaluable is less than 12 months after randomization then the individual OMT goal is missing. Last visit individual OMT goals could be assessed at different visits.

<sup>2</sup>Based on Morisky-Green-Levine medication adherence survey (Morisky DE, Green LW, Levine DM. Concurrent and predictive validity of a self-reported measure of medication adherence. *Medical Care* 1986;24:67-74). A summary binary variable was created by coding those who responded strongly agree, agree, don't know, or refuse to any of the 4 questions in the survey as non-adherent; otherwise, patients were coded as adherent.

“\*” marks p-value smaller than 0.05 of comparison between Not Listed and Listed. P-values were obtained using Pearson's chi-squared test, or Fisher's exact test when expected cell size was smaller than five.

Table S1b. Baseline and On-Trial Physiologic Measurements, Risk Factors, and Medications by Listed Status and treatment strategy.

|                                | Only Listed participants (n = 194) |             |             |             | Only Not Listed participants (n = 583) |                  |                  |                  |
|--------------------------------|------------------------------------|-------------|-------------|-------------|----------------------------------------|------------------|------------------|------------------|
|                                | Baseline                           |             | Last visit  |             | Baseline                               |                  | Last visit       |                  |
|                                | CON                                | INV         | CON         | INV         | CON                                    | INV              | CON              | INV              |
| <b>Variables</b>               | (n=100)                            | (n=94)      | (n=100)     | (n=94)      | (n=289)                                | (n=294)          | (n=289)          | (n=294)          |
| Systolic BP <140 mm Hg         | 52/100<br>(52%)                    | 57/93 (61%) | 62/89 (70%) | 51/76 (67%) | 167/289<br>(58%)                       | 153/294<br>(52%) | 174/250<br>(70%) | 163/241<br>(68%) |
| LDL cholesterol <70 mg/dl      | 31/90 (34%)                        | 38/83 (46%) | 35/79 (44%) | 35/67 (52%) | 97/278<br>(35%)                        | 88/276<br>(32%)  | 119/231<br>(52%) | 109/226<br>(48%) |
| Not smoking                    | 94/100<br>(94%)                    | 88/94 (94%) | 82/84 (98%) | 67/72 (93%) | 257/289<br>(89%)                       | 254/294<br>(86%) | 220/239<br>(92%) | 211/235<br>(90%) |
| <b>Medications</b>             |                                    |             |             |             |                                        |                  |                  |                  |
| Aspirin or aspirin alternative | 75/97 (77%)                        | 70/91 (77%) | 72/86 (84%) | 67/72 (93%) | 227/270<br>(84%)                       | 244/282<br>(87%) | 211/239<br>(88%) | 198/230<br>(86%) |
| Clopidogrel                    | 19/100<br>(19%)                    | 8/93 (9%)   | 14/89 (16%) | 12/77 (16%) | 67/289<br>(23%)                        | 81/294<br>(28%)  | 67/252<br>(27%)  | 82/246<br>(33%)  |
| Anticoagulant                  | 6/100 (6%)                         | 4/91 (4%)   | 5/88 (6%)   | 9/77 (12%)  | 37/284<br>(13%)                        | 32/288<br>(11%)  | 27/251<br>(11%)  | 27/245<br>(11%)  |
| Statins                        | 76/100<br>(76%)                    | 68/93 (73%) | 63/89 (71%) | 61/77 (79%) | 237/289<br>(82%)                       | 248/294<br>(84%) | 222/252<br>(88%) | 220/246<br>(89%) |
| High-intensity statin          | 22/100                             | 24/93 (26%) | 26/89 (29%) | 36/77 (47%) | 71/288                                 | 86/292           | 94/252           | 97/246           |

|                                             |              |             |             |             |               |               |               |               |
|---------------------------------------------|--------------|-------------|-------------|-------------|---------------|---------------|---------------|---------------|
|                                             | (22%)        |             |             | *           | (25%)         | (29%)         | (37%)         | (39%)         |
| Ezetimibe                                   | 2/100 (2%)   | 6/93 (6%)   | 5/89 (6%)   | 8/77 (10%)  | 9/289 (3%)    | 10/294 (3%)   | 54/252 (21%)  | 55/246 (22%)  |
| ACE inhibitor / ARB                         | 39/100 (39%) | 50/93 (54%) | 41/89 (46%) | 29/77 (38%) | 147/289 (51%) | 134/294 (46%) | 107/252 (42%) | 106/246 (43%) |
| <b>Adherence to Medications<sup>2</sup></b> | 68/99 (69%)  | 63/87 (72%) | 72/85 (85%) | 61/74 (82%) | 177/278 (64%) | 171/283 (60%) | 171/242 (71%) | 165/241 (68%) |

Notes: ACE= angiotensin converting enzyme; ARB= angiotensin receptor blockers; BP= blood pressure; CON= conservative; INV= invasive; LDL= low density lipoprotein. Aspirin alternative denotes P2Y12 inhibitor. Antiplatelet denotes aspirin or P2Y12 inhibitor.

<sup>1</sup>For each individual OMT goal, the last visit is defined as the latest visit (at least 12 months after randomization) where the goal is evaluable. If the latest visit where the goal is evaluable is less than 12 months after randomization then the individual OMT goal is missing. Last visit individual OMT goals could be assessed at different visits.

<sup>2</sup>Based on Morisky-Green-Levine medication adherence survey (Morisky DE, Green LW, Levine DM. Concurrent and predictive validity of a self-reported measure of medication adherence. Medical Care 1986;24:67-74). A summary binary variable was created by coding those who responded strongly agree, agree, don't know, or refuse to any of the 4 questions in the survey as non-adherent; otherwise, patients were coded as adherent.

“\*” marks p-value smaller than 0.05 of comparison between CON and INV

Table S2. Adjusted<sup>a</sup> hazard ratios for the invasive versus conservative strategy by renal transplant candidacy status estimated from Cox proportional hazards models of the component secondary outcomes.

|                                        | No. (%) of Patients with an Event |                | Adj. HR <sup>b</sup><br>(95% CI) | P-value for Interaction |
|----------------------------------------|-----------------------------------|----------------|----------------------------------|-------------------------|
|                                        | CON<br>(n=389)                    | INV<br>(n=388) |                                  |                         |
| <b>Secondary Outcomes</b>              |                                   |                |                                  |                         |
| <i>All-cause death</i>                 |                                   |                |                                  | 0.757                   |
| Not Listed                             | 75/289 (26%)                      | 73/294 (25%)   | 1.04<br>(0.75, 1.44)             |                         |
| Listed                                 | 23/100 (23%)                      | 21/94 (22%)    | 0.94<br>(0.52, 1.69)             |                         |
|                                        |                                   |                |                                  |                         |
| <i>Non-fatal myocardial infarction</i> |                                   |                |                                  | 0.634                   |
| Not Listed                             | 44/289 (15%)                      | 34/294 (12%)   | 0.80<br>(0.51, 1.25)             |                         |
| Listed                                 | 12/100 (12%)                      | 12/94 (13%)    | 1.00<br>(0.45, 2.23)             |                         |
|                                        |                                   |                |                                  |                         |
| <i>Unstable angina</i>                 |                                   |                |                                  | 1.000                   |
| Not Listed                             | 4/289 (1%)                        | 1/294 (0%)     | 0.17<br>(0.02, 1.75)             |                         |
| Listed                                 | 2/100 (2%)                        | 0/94 (0%)      | - <sup>c</sup>                   |                         |
|                                        |                                   |                |                                  |                         |
| <i>Heart failure</i>                   |                                   |                |                                  | 0.259                   |
| Not Listed                             | 9/289 (3%)                        | 14/294 (5%)    | 1.80<br>(0.77, 4.22)             |                         |
| Listed                                 | 3/100 (3%)                        | 3/94 (3%)      | 0.62<br>(0.12, 3.21)             |                         |
|                                        |                                   |                |                                  |                         |
| <i>Resuscitated cardiac arrest</i>     |                                   |                |                                  | -                       |
| Not Listed                             | 0/289 (0%)                        | 0/294 (0%)     | -                                |                         |
| Listed                                 | 0/100 (0%)                        | 0/94 (0%)      | -                                |                         |
|                                        |                                   |                |                                  |                         |
| <i>Stroke</i>                          |                                   |                |                                  | 0.122                   |
| Not Listed                             | 2/289 (0%)                        | 15/294 (5%)    | 7.91<br>(1.80, 34.77)            |                         |
| Listed                                 | 4/100 (4%)                        | 7/94 (2%)      | 1.72<br>(0.49, 5.96)             |                         |

<sup>a</sup>All models are adjusted for age, sex, kidney function, left ventricular ejection fraction, and diabetes.

<sup>b</sup>The hazard ratio is for the invasive-strategy group as compared with the conservative-strategy group.

<sup>c</sup>Due to limited number of events for UA and RCA, the hazard ratio could not be calculated well.

Supplementary Figures

Figure S1a. Not listed and listed flow diagram

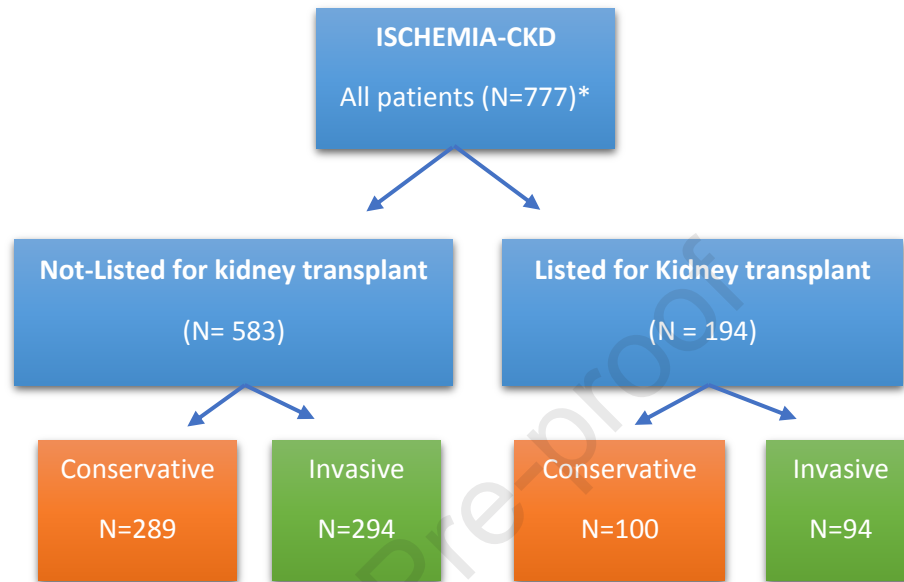

Flow diagram of patients between Not-Listed and Listed and treatment strategy allocation within each of those groups

Figure S1b. Cardiac Catheterization and Revascularization Rates by Kidney Transplant Listing Status\*

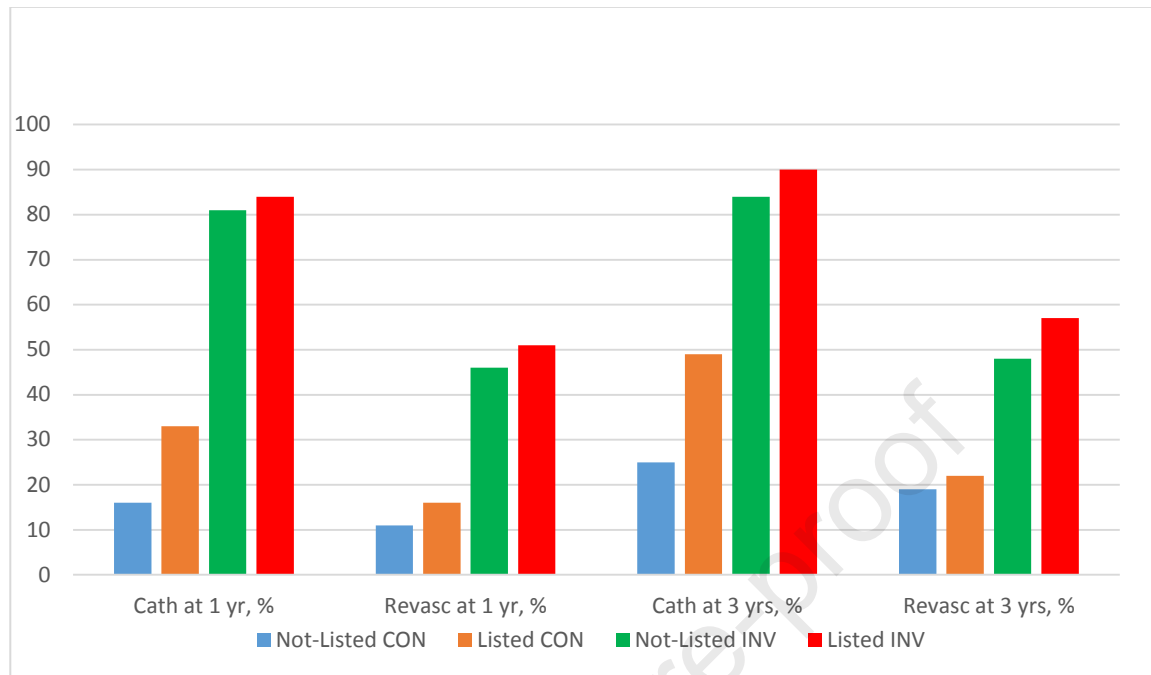

Represents the proportion of patients within CON and INV who received coronary angiography and revascularization between those who were Not-Listed and Listed

\*Cardiac cath rates for all patients (N=777) at 3 years: CON 31%, INV 85%.

\*Revascularization rates for all patients (N=777) at 3 years: CON 19%, INV 50%.



Figure S2. Reasons for Coronary Angiography and Revascularization at 3 Years in the Conservative Group of Listed Patients (n=100)

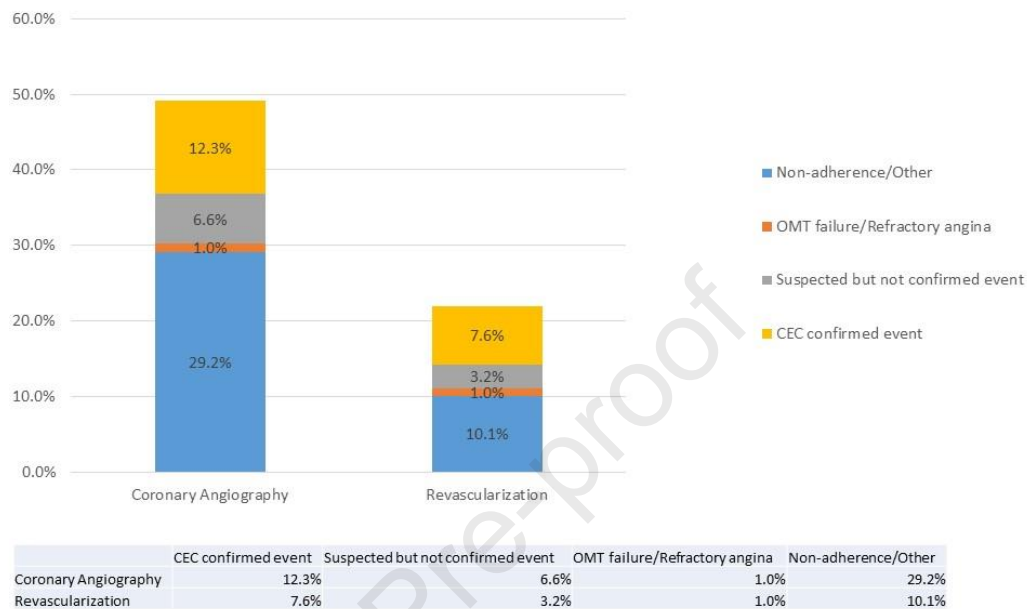

Stacked bar chart of reasons for coronary angiography (left) and revascularization (right) in Listed patients in the initial conservative strategy arm.

Figure S3. Forest Plot of Interaction between Listing status and Primary and Secondary outcomes

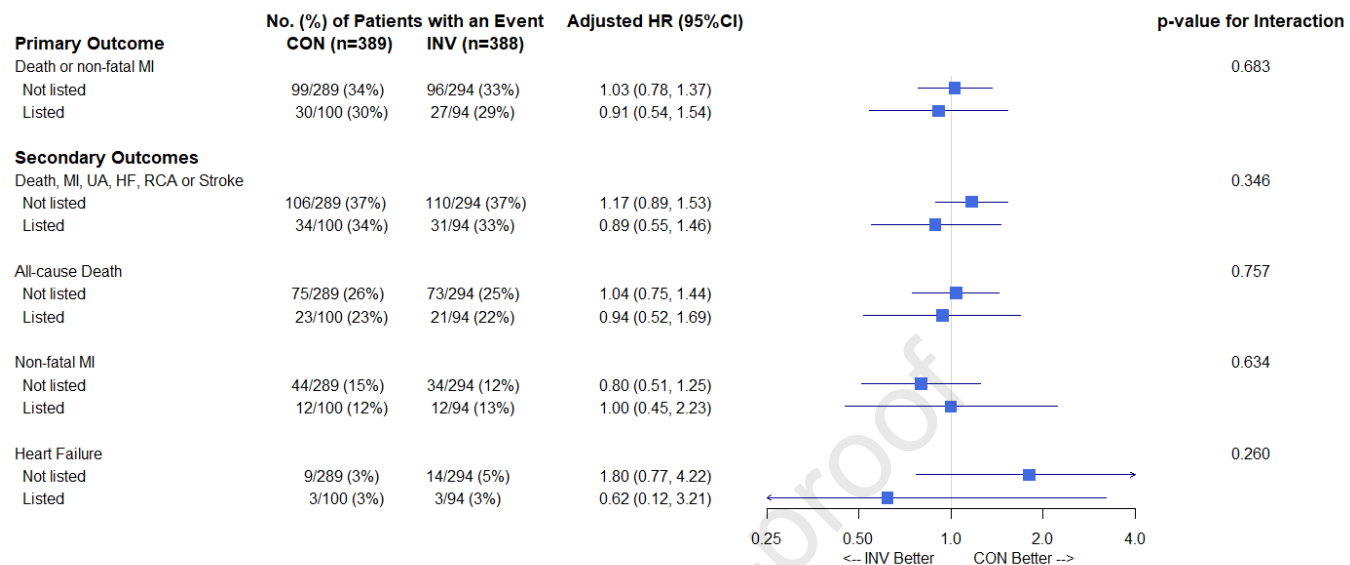

Forest plot for interaction between listing status and randomization group for primary and secondary outcomes

## ISCHEMIA-CKD Trial Committee Members and Key Personnel

### **National Heart, Lung, and Blood Institute**

Jerome L. Fleg, Project Officer

Ruth Kirby

### **ISCHEMIA Clinical Coordinating Center (CCC)\***

#### **Study Leadership**

Sripal Bangalore (Principal Investigator)

#### **CCC Faculty**

Jeffrey Berger (Director of the Biorepository, ISCHEMIA Regional Leader)

Roy Mathew (Country Lead Nephrologist for US)

Jonathan Newman (ISCHEMIA Regional Leader)

Harmony R. Reynolds (ISCHEMIA Regional Leader)

Mandeep Sidhu (US-VA Regional Co-Leader)

#### **Program Director**

Stephanie Mavromichalis

#### **Project Managers**

Gia Cobb

Stephanie Ferket\*\*

Andre Gabriel\*\*

#### **Clinical Research Associates**

Diana Cukali

Kevin McMahon\*\*

#### **Clinical Trial Assistants**

Ahmed Ayoub

Matthew Shinseki\*\*

Paula Wilson

Solomon Yakubov\*\*

#### **Data Analyst**

Mark Xavier

*\*see ISCHEMIA Trial Design Manuscript for complete listing*

*\*\*past members*

### **ISCHEMIA Statistical and Data Coordinating Center, Duke Clinical Research Institute**

Sean O' Brien, Principal Investigator

See ISCHEMIA Trial Design Manuscript for complete listing

## **ISCHEMIA-CKD Committee Members**

### **Steering Committee**

Sripal Bangalore, Principal Investigator  
Judith S. Hochman, ISCHEMIA trial Chair  
David J. Maron, ISCHEMIA trial Co-Chair  
Glenn M. Chertow, Nephrologist  
William Boden, ISCHEMIA trial Co-PI  
Bruce Ferguson, ISCHEMIA trial Co-PI  
Robert Harrington, ISCHEMIA trial Co-PI  
Gregg W. Stone, ISCHEMIA trial Co-PI  
David O. Williams, ISCHEMIA trial Co-PI

### **Renal Committee**

Charles A. Herzog (Chair)  
David M. Charytan (Co-Chair)  
Sripal Bangalore  
Carlo Briguori  
David M. Charytan  
Glenn M. Chertow  
Jerome Fleg  
Peter A. McCullough  
Roxana Mehran  
Ruth Kirby

### **Publications Committee**

Sripal Bangalore (Chair)  
Karen Alexander  
Jerome Fleg  
Judith S. Hochman  
David J. Maron  
Roy Mathew  
Sean M. O'Brien  
Harmony R. Reynolds  
Mandeep Sidhu

### **Optimal Medical Therapy Committee**

Same as the ISCHEMIA trial (See ISCHEMIA Trial Design Manuscript for complete listing)

### **Optimal Revascularization Therapy Planning Committee**

Same as the ISCHEMIA trial (See ISCHEMIA Trial Design Manuscript for complete listing)

### **Clinical Event Review Committee**

Same as the ISCHEMIA trial (See ISCHEMIA Trial Design Manuscript for complete listing)

### **BioRepository Committee**

Same as the ISCHEMIA trial (See ISCHEMIA Trial Design Manuscript for complete listing)

  
**EQOL Committee**

Same as the ISCHEMIA trial (See ISCHEMIA Trial Design Manuscript for complete listing)

**Recruitment for Women & Minorities**

Same as the ISCHEMIA trial (See ISCHEMIA Trial Design Manuscript for complete listing)

**DSMB Members**

Same as the ISCHEMIA trial (See ISCHEMIA Trial Design Manuscript for complete listing)

**Independent Statistical Analysis Center for DSMB Reporting**

Same as the ISCHEMIA trial (See ISCHEMIA Trial Design Manuscript for complete listing)

**ECG/ETT CoreLab**

Same as the ISCHEMIA trial (See ISCHEMIA Trial Design Manuscript for complete listing)

**Angiographic Core Lab**

Same as the ISCHEMIA trial (See ISCHEMIA Trial Design Manuscript for complete listing)

**Academic Research Organizations (AROs)**

Same as the ISCHEMIA trial (See ISCHEMIA Trial Design Manuscript for complete listing)

**Contract Research Organizations (CROs)**

Same as the ISCHEMIA trial (See ISCHEMIA Trial Design Manuscript for complete listing)

Journal Pre-proof

## ISCHEMIA-CKD Trial Site Personnel

| Country (No. Randomizations) | Investigator(s)                                                                                                                                                                                 | Study Coordinator(s)                                                                                                                                 | City & State (if applicable) | Institution (No. Randomizations)                    |
|------------------------------|-------------------------------------------------------------------------------------------------------------------------------------------------------------------------------------------------|------------------------------------------------------------------------------------------------------------------------------------------------------|------------------------------|-----------------------------------------------------|
| <b>United States (159)</b>   |                                                                                                                                                                                                 |                                                                                                                                                      |                              |                                                     |
| Lead Country Nephrologist    |                                                                                                                                                                                                 |                                                                                                                                                      |                              |                                                     |
| Roy Mathew, MD               | Mayil S. Krishnam, MD<br>Jeffrey C. Milliken, MD<br>Pranav M. Patel, MD<br>Arnold H. Seto, MD<br>Kevin T. Harley, MD (N)<br>Michael A. Gibson, MD<br>Byron J. Allen, MD<br>Wei Ling Lau, MD (N) | Shirin Heydari, MS<br>Edgar Karanjah, MD<br>Wanda C. Marfori, MD<br>Eduardo Hernandez-Rangel, MD<br>Pam Singh                                        | Orange, CA                   | University of California Irvine Medical Center (23) |
|                              | Patricia Pellikka, MD<br>LaTonya J. Hickson, MD (N)                                                                                                                                             | Gaylin Petty, CVT<br>Susan K. Milbrandt<br>Dawn D. Shelstad                                                                                          | Rochester, MN                | Mayo Clinic (16)                                    |
|                              | Harmony R. Reynolds, MD<br>Jonathan D. Newman, MD, MPH<br>Sripal Bangalore, MD, MHA<br>Lawrence M. Phillips, MD<br>Muhammed Saric, MD<br>Olga Zhdanova, MD (N)                                  | Stanley E. Cobos, BA<br>Kirsten J. Quiles, MS<br>Raven R. Dwyer, MPH<br>Dalisa Espinosa, MBS                                                         | New York, NY                 | NYU Langone Medical Center-Bellevue Hospital (15)   |
|                              | Kreton Mavromatis, MD<br>Jason Linefsky, MD<br>Harold Franch, MD (N)                                                                                                                            | John Doan, MD<br>Raven Lee, CCRP<br>Risha Patel                                                                                                      | Decatur, GA                  | Atlanta VA Medical Center (13)                      |
|                              | Anjali Acharya, MD (N)<br>Seth Sokol, MD<br>Jay Meisner, MD<br>Amit Kakkar, MD<br>Tarek Rashid, MD<br>Hatem Elabd, MD                                                                           | Jeanne Russo, RN<br>Cidney Schultz, RN                                                                                                               | Bronx, NY                    | Jacobi Medical Center (12)                          |
|                              | Charles Herzog, MD<br>Mengistu Simegn, MD                                                                                                                                                       | Shari Mackedanz<br>Barbara Wicklund                                                                                                                  | Minneapolis, MN              | Hennepin County Medical Center (9)                  |
|                              | Salvatore P. Costa, MD<br>Terrance Welch, MD<br>Michael Chobanian, MD (N)                                                                                                                       | Henry C. Stokes, RN<br>Gaylin Petty, CVT                                                                                                             | Lebanon, NH                  | Dartmouth Hitchcock Medical Center (7)              |
|                              | Subhash Banerjee, MD                                                                                                                                                                            | Preeti Kamath, BDS, MHA, CCRP<br>Ishita Tejani, BDS, MS, MSPH                                                                                        | Dallas, TX                   | V.A. North Texas Health Care System (6)             |
|                              | Adedayo Adeboye, MD<br>Roy Mathew, MD (N)                                                                                                                                                       | Amy Flowers<br>Kathryn Mason<br>Anjana Rishmawi                                                                                                      | Columbia, SC                 | William Jennings Bryan Dorn V.A. Medical Center (5) |
|                              | Sudhanva S. Hegde, MD                                                                                                                                                                           | Stanley E. Cobos, BA<br>Raven R. Dwyer, MPH<br>Dalisa Espinosa, MBS<br>Kirsten J. Quiles, MS<br>Carolyn J. Gruber, PA-C<br>Noelle M. Durfee, MS PA-C | Brooklyn, NY                 | Kings County Hospital Center (9)                    |
|                              | Khaled Abdul-Nour, MD<br>Lalathaksha Kumbar, MD (N)<br>Jerry Yee, MD (N)                                                                                                                        | Heather Golden<br>Naima L. Ogletree, DNP, APRN-BC<br>Schawana Thaxton, DNP, NP-C                                                                     | Detroit, MI                  | Henry Ford Health System (4)                        |

|                                                                                                                                                                                                                                                                                                                                                 |                                                                                                                                       |                  |                                                        |
|-------------------------------------------------------------------------------------------------------------------------------------------------------------------------------------------------------------------------------------------------------------------------------------------------------------------------------------------------|---------------------------------------------------------------------------------------------------------------------------------------|------------------|--------------------------------------------------------|
| Alec Moorman, MD<br>Bilal Malik, MD (N)                                                                                                                                                                                                                                                                                                         | Fatima Ranjbaran, RN<br>Bryn Smith, BS<br>Carly Ohmart                                                                                | Seattle, WA      | University of Washington Medical Center (4)            |
| Radmilar Lyubarova, MD<br>Mohammad El-Hajjar, MD<br>Mandeep S. Sidhu, MD, MBA<br>Steven A. Fein, MD<br>Mikhail T. Torosoff, MD, PhD<br>Radmila Lyubarova, MD<br>Sulagna Mookherjee, MD<br>Krzysztof Drzymalski, MD<br>Rafia Chaudhry, MD (N)<br>Krishnakumar Hongalgi, MD (N)<br>Arif Asif, MD (N)(2012-2015)<br>Loay Salman, MD (N)(2015-2018) | Wendy L. Stewart, MS<br>Kristin M. Salmi, BS                                                                                          | Albany, NY       | Albany Medical Center Hospital (3)                     |
| Patricia K. Nguyen, MD<br>Yiming Lit, MD (N)                                                                                                                                                                                                                                                                                                    | Davis Vo, BS<br>James Hirsch, BS                                                                                                      | Palo Alto, CA    | VA Palo Alto Healthcare System (3)                     |
| Steven P. Sedlis, MD<br>Robert M. Donnino, MD<br>Jeffrey Lorin, MD<br>David Goldfarb, MD (N)                                                                                                                                                                                                                                                    | Leandro C. Maranan, CCRC                                                                                                              | New York, NY     | VA New York Harbor Health Care System (3)              |
| Mohammad El-Hajjar, MD<br>Paul Der Mesropian, MD (N)<br>Joseph Sacco, MD<br>Naveed Akhtar, MD<br>Maris Orgera, MD<br>Mandeep S. Sidhu, MD, MBA (2012-2016)<br>Roy Mathew, MD (N) (2012-2015)<br>Elvira Gosmanova, MD (N) (2015-2018)                                                                                                            | Jennifer Thomson, MA                                                                                                                  | Albany, NY       | Samuel Stratton VA Medical Center of Albany NY (2)     |
| Fadi Hage, MD<br>Dana Rizk, MD (N)<br>James E. Davies, MD<br>Massoud Leesar, MD<br>Jaekyeong Heo, MD<br>Amy Iskandrian, MD<br>Firas Al Solaiman, MD<br>Satinder Singh, MD                                                                                                                                                                       | Badhma Valaiyapathi, MD                                                                                                               | Birmingham, AL   | UAB Vascular Biology and Hypertension Program (2)      |
| Peter H. Stone, MD<br>David Charytan, MD (N)                                                                                                                                                                                                                                                                                                    | Hermine Osseni, MS<br>Charlene Wiyarand (BS)<br>Peter Douglass, BA<br>Hayley Pomeroy, BA<br>Alexandra Craft, BA<br>Bethany Harvey, BA | Boston, MA       | Brigham & Women's Hospital, Harvard Medical School (2) |
| Kevin Marzo, MD<br>Juan Gaztanaga, MD<br>Shayan Shirazian, MD (N)                                                                                                                                                                                                                                                                               | Wendy Drewes, RN<br>Dipti Patel, RN                                                                                                   | Mineola, NY      | NYU Winthrop (2)                                       |
| Lekshmi Dharmarajan, MD                                                                                                                                                                                                                                                                                                                         | Jenne M. Jose, PA<br>Stanley E. Cobos, BA<br>Raven R. Dwyer, MPH<br>Kirsten J. Quiles, MS                                             | Bronx, NY        | NYU-HHC Lincoln Medical and Mental Health Center (2)   |
| Janani Rangaswami, MD (N)<br>Christian Witzke, MD<br>Gregg Pressman, MD                                                                                                                                                                                                                                                                         | Rachel Murphy, BS<br>Kinnari Murphy, MPH                                                                                              | Philadelphia, PA | Albert Einstein Medical Center (2)                     |
| John B. Kostis, MD                                                                                                                                                                                                                                                                                                                              | Nora M. Cosgrove, RN                                                                                                                  | New              | Cardiovascular Institute, Rutgers RWJ Medical          |

|                                                                                         |                                                                                                                                   |                      |                                                      |
|-----------------------------------------------------------------------------------------|-----------------------------------------------------------------------------------------------------------------------------------|----------------------|------------------------------------------------------|
|                                                                                         |                                                                                                                                   | Brunswick, NJ        | School (1)                                           |
| Abel E. Moreyra, MD<br>Jonathan Lebowitz, MD (N)                                        |                                                                                                                                   |                      |                                                      |
| Ellis W. Lader, MD<br>Beth Stefanchik, MD (N)                                           | Martha Meyer, RN, MSN                                                                                                             | Kingston, NY         | Mid Valley Cardiology (1)                            |
| Sampornima Setty, MD<br>Balaji Srinivasan, MD (N)                                       | Kimberly E. Halverson, RHIT<br>Christine Roraff, RN<br>Jonean Thorsen, RN                                                         | La Crosse, WI        | Gundersen Lutheran Medical Center (1)                |
| Rita Coram, MD                                                                          | Anne Marie Webb, BSN<br>Ellie Fridell, BS<br>Heidi Wilson, BS                                                                     | Louisville, KY       | University of Louisville (1)                         |
| David Booth, MD<br>John Kotter, MD<br>Ahmed Abdel-Latif, MD, PhD<br>Sadiq Ahmed, MD (N) | Yvonne Taul, RN<br>Caroline Rodgers, RN<br>Jennifer Isaacs, MS<br>Viktoria Bulkley, RN<br>Laura True, RN<br>Alexandra Hunter, MPH | Lexington, KY        | Lexington VA Medical Center (1)                      |
| Michelle Ratliff, MD<br>Karen Servilla, MD (N)                                          | Robyn Elliott<br>Jennifer Hogan                                                                                                   | Albuquerque, NM      | New Mexico V.A. Healthcare System (1)                |
| James J. Jang, MD<br>Gennie Yee, MD<br>Deepa Ramaswamy, MD (N)                          | Olivia Anaya                                                                                                                      | San Jose, CA         | Kaiser Permanente San Jose (1)                       |
| Michel Georges Khouri, MD<br>John Middleton, MD (N)                                     | Kristine Arges<br>Melissa LeFevre<br>Jennifer Tomfohr                                                                             | Durham, NC           | Duke University Medical Center (1)                   |
| Jason T. Call, MD<br>David Sisson, MD (N)                                               | Stephanie, M. Lane, RN, BSN, CCRN<br>Jennifer L. Stanford, RN, MSN                                                                | Winchester, VA       | Winchester Cardiology and Vascular Medicine, PC (1)  |
| Prakash Deedwania, MD<br>Kiran Reddy, MD<br>Mei Hwang, MD (N)                           | Antonia Vega                                                                                                                      | Fresno, CA           | UCSF - Fresno Community Regional Medical Center (1)  |
| Steven Weitz, MD<br>Page Salanger, MD (N)                                               | Steven Giovannone<br>Lori Pritchard, RN                                                                                           | Schenectady, NY      | Cardiology Associates of Schenectady P.C. (1)        |
| Ray Wyman, MD                                                                           | Joy Burkhardt, CCRP<br>Suellen Hosino, RN, BSN, CCRP                                                                              | Torrance, CA         | Torrance Memorial Medical Center (1)                 |
| Khaled Dajani, MD<br>Holly Mattix-Kramer, MD (N)<br>Verghese Mathew, MD                 | Carol M. Kartje, BSN                                                                                                              | Maywood, IL          | Loyola University Medical Center (1)                 |
| Michael D. Shapiro, DO<br>Jose Rueda, MD (N)                                            | Aynun Naher, MBBS, MS<br>David Schlichting, LPN                                                                                   | Portland, OR         | Oregon Health & Science University (1)               |
| Omar Almousalli, MD<br>John Lehman, MD<br>Norbert Urbanski, MD                          | Elizabeth Capasso-Gulve<br>Alaine Melanie Loehr<br>Marlowe Mosley                                                                 | Fairview Heights, IL | Advanced Heart Care Group / MEDICORICIUM, L.L.C. (1) |

#### Russia (111)

Lead Country Cardiologist  
Olga Bockeria, MD, PhD  
Lead Country Nephrologist  
Evgeny Shutov, MD

|                                                                                                                                |                                               |             |                                                                                                       |
|--------------------------------------------------------------------------------------------------------------------------------|-----------------------------------------------|-------------|-------------------------------------------------------------------------------------------------------|
| Alexander M. Chernyavskiy, MD, PhD<br>Evgeniy I. Kretov, MD<br>Igor O. Grazhdankin, MD<br>Alexander Sergeevich Borisov, MD (N) | Ivan A. Naryshkin, MD                         | Novosibirsk | E.Meshalkin National Medical Research Center of the Ministry of Health of the Russian Federation (73) |
| Leo A. Bockeria, MD, PhD<br>Karen Petrosyan, MD, PhD                                                                           | Olga Bockeria, MD, PhD<br>Zalina Kudzoeva, MD | Moscow      | National Medical Research Center for Cardiovascular Surgery (34)                                      |



|                                      |                   |                  |                                            |
|--------------------------------------|-------------------|------------------|--------------------------------------------|
| Evgeny Shutov, MD (N)                |                   |                  |                                            |
| Leonid L. Bershtein, MD, PhD         | Irina Subbotina   | Saint Petersburg | North-Western State Medical University (4) |
| Sergey A. Sayganov, MD, PhD          | Victoria Gumerova |                  |                                            |
| Anastasia M. Kuzmina-Krutetskaya, MD |                   |                  |                                            |
| Elizaveta V. Zbyshevskaya, MD, PhD   |                   |                  |                                            |
| Nana O. Katamadze, MD, PhD           |                   |                  |                                            |
| Vladimir Rysniansky, MD (N)          |                   |                  |                                            |

#### Poland (105)

Lead Country Cardiologists  
Radoslaw Pracon, MD, PhD  
Marcin Demkow, MD, PhD  
Lead Country Nephrologist  
Robert Malecki, MD

|                                         |                                               |          |                                                                                                                   |
|-----------------------------------------|-----------------------------------------------|----------|-------------------------------------------------------------------------------------------------------------------|
| Tomasz Mazurek, MD, PhD                 | Jakub Maksym, MD                              | Warszawa | Medical University of Warsaw (57)                                                                                 |
| Karolina Wojtera, MD                    |                                               |          |                                                                                                                   |
| Anna Fojt, MD                           |                                               |          |                                                                                                                   |
| Ewa Szczerba, MD                        |                                               |          |                                                                                                                   |
| Piotr Pruszczyk, MD, PhD                | Andrzej Łabyk, MD                             | Warszawa | Department of Internal Medicine and Cardiology, Infant Jesus Teaching Hospital, Medical University of Warsaw (22) |
| Marek Roik, MD, PhD                     | Agnieszka Szramowska, MD<br>Olga Zdończyk, MD |          |                                                                                                                   |
| Marcin Demkow, MD, PhD                  | Olga Walesiak                                 | Warsaw   | Coronary and Structural Heart Diseases Department, Institute of Cardiology (19)                                   |
| Radoslaw Pracon, MD, PhD                | Katarzyna Malinowska                          |          |                                                                                                                   |
| Cezary Kepka, MD PhD                    |                                               |          |                                                                                                                   |
| Anna Teresinska, MD PhD                 |                                               |          |                                                                                                                   |
| Karolina Kryczka, MD PhD                |                                               |          |                                                                                                                   |
| Jan Henzel, MD PhD                      |                                               |          |                                                                                                                   |
| Mateusz Solecki, MD PhD                 |                                               |          |                                                                                                                   |
| Edyta Kaczmarska, MD PhD                |                                               |          |                                                                                                                   |
| Robert Malecki, MD (N)                  |                                               |          |                                                                                                                   |
| Jaroslaw Drozd, PhD                     | Marta Swiderek, MA                            | Lodz     | Cardiology Clinic, Medical University in Lodz (7)                                                                 |
| Bartosz Czarniak, MD                    | Ewelina Wojtala, MA                           |          |                                                                                                                   |
| Malgorzata Frach (formerly Stasiak), MD |                                               |          |                                                                                                                   |
| Konrad Szymczyk, MD                     |                                               |          |                                                                                                                   |
| Iwona Niedzwiecka, MD                   |                                               |          |                                                                                                                   |
| Sebastian Sobczak, MD                   |                                               |          |                                                                                                                   |
| Tomasz Ciurus, MD                       |                                               |          |                                                                                                                   |
| Piotr Jakubowski, MD                    |                                               |          |                                                                                                                   |
| Magdalena Misztal-Teodorczyk, MD        |                                               |          |                                                                                                                   |
| Dawid Teodorczyk, MD                    |                                               |          |                                                                                                                   |
| Aleksandra Fratczak, MD                 |                                               |          |                                                                                                                   |
| Marcin Szkopiak, MD                     |                                               |          |                                                                                                                   |
| Patrycja Lebioda, MD                    |                                               |          |                                                                                                                   |
| Michal Wlodarczyk, MD                   |                                               |          |                                                                                                                   |
| Anna Plachcinska, MD                    |                                               |          |                                                                                                                   |
| Jacek Kusmierek, MD                     |                                               |          |                                                                                                                   |
| Magdalena Miller, MD                    |                                               |          |                                                                                                                   |
| Halina Marciniak, MD                    |                                               |          |                                                                                                                   |
| Karolina Wojtczak-Soska, MD             |                                               |          |                                                                                                                   |
| Katarzyna Łuczak, MD                    |                                               |          |                                                                                                                   |
| Tomasz Tarchalski, MD                   |                                               |          |                                                                                                                   |
| Anna Cichocka-Radwan, MD                |                                               |          |                                                                                                                   |

#### India (92)

Lead Country Cardiology

Balram Bhargava, DM  
Lead Country Nephrologist  
Sandeep Mahajan, MD

|                                                                                                                                                                                                                                                                                                                                                                                                                         |                                                                                                                                |            |                                                                    |
|-------------------------------------------------------------------------------------------------------------------------------------------------------------------------------------------------------------------------------------------------------------------------------------------------------------------------------------------------------------------------------------------------------------------------|--------------------------------------------------------------------------------------------------------------------------------|------------|--------------------------------------------------------------------|
| Sajeew Chakanalil Govindan, MD, DNB, DM, PhD<br>Rajesh Gopalan Nair, MD, DNB, DM<br>Meleamadathil Srilatha, MD, DM (N)                                                                                                                                                                                                                                                                                                  | Anjali Anand, MSc<br>Janitha Raj, B.Tech<br>Reshma Ravindran, MSc<br>Rajalekshmi VS, MSc, MScCRRA                              | Calicut    | Government Medical College (23)                                    |
| Atul Mathur, MD<br>Upendra Kaul, MD<br>Sanjeev Gulati MD, DM (N)                                                                                                                                                                                                                                                                                                                                                        | Ajit Singh Narula, MD<br>Vijay Kher, MD<br>Puneet Sodhi, MD                                                                    | New Delhi  | Fortis Escort Heart Institute (13)                                 |
| Anoop Mathew, MD<br>Eapen Punnoose, MD<br>TA Kishore, MD (N)<br>Satish Sankaranarayanan, MD (N)                                                                                                                                                                                                                                                                                                                         | Binoy Mannekkattukudy Kurian                                                                                                   | Kolenchery | MOSC Medical College Hospital (12)                                 |
| Ranjan Kachru, MD<br>Sanjeev Gulati, MD (N)                                                                                                                                                                                                                                                                                                                                                                             | Abhishek Dubey, PGDACR                                                                                                         | New Delhi  | Fortis Healthcare Fl.t Lt. Rajan Dhall Hospital (11)               |
| Balram Bhargava, DM<br>Sandeep Mahajan, MD (N)<br>G.Karthikeyan, DM<br>S.Ramakrishnan, DM<br>Sandeep Seth, DM<br>Rakesh Yadav, DM<br>Sandeep Singh, DM<br>Ambuj Roy, DM<br>Neeraj Parakh, DM<br>Sunil Kumar Verma, DM<br>Rajiv Narang, DM<br>Sundeep Mishra, DM<br>Nitish Naik, DM<br>Gautam Sharma, DM<br>Shiv Kumar Choudhary, M.Ch<br>Chetan Patel, DNB<br>Gurpreet Gulati, MD<br>Sanjeev Sharma, MD<br>V K Bahl, DM | Chandini Suvarna, BDS                                                                                                          | New Delhi  | All India Institute Of Medical Sciences (8)                        |
| Neeraj Pandit, MD, DM<br>Ajay Sharma, MD, DM<br>Niruta Sharma MD<br>Hemant Shakhar Mahapatra MD                                                                                                                                                                                                                                                                                                                         | Sheromani Bajaj<br>Vandana Yadav, Msc, PGDACR<br>Girish Mishra, Msc, PGDACR                                                    | New Delhi  | Dr Ram Manohar Lohia Hospital (5)                                  |
| Cholenahally Nanjappa Manjunath, MD, DM<br>Nagaraja Moorthy, MD, DM<br>Satvic Cholenahally Manjunath, MD, DM<br>Suryaprakash Narayanappa, MBBS<br>Umesh Lingaraj, MD (N)<br>Veerabhadra Gupta, MD (N)                                                                                                                                                                                                                   | Nandita Nataraj, BE(Biotech) PGDICRCMD<br>Soundarya Nayak, BE(Biotech) PGDICRCMD<br>Mahevamma Mylarappa, GNM (General Nursing) | Bengaluru  | Sri Jayadeva Institute of Cardiovascular Sciences and Research (4) |
| Miliind Avdhoot Gadkari, MD<br>Siddharth Gadage, MD DNB<br>Tapan Umesh Pillay, BHMS MSc<br>Valentine Lobo, MD (N)                                                                                                                                                                                                                                                                                                       | Sheetal Rupesh Karwa, BHMS<br>Suvarna Kolhe, MSc                                                                               | Pune       | KEM Hospital Pune (4)                                              |
| Johann Christopher, MD, DNB<br>Nirmal Kumar, MD, DM<br>Suresh Kumar, MD, DM (N)                                                                                                                                                                                                                                                                                                                                         | K. Manjula Rani, MSc.<br>M. Sowjanya Reddy, BSc<br>K. Preethi, BSc                                                             | Hyderabad  | Gurunanak CARE Hospital (3)                                        |

|                                                                                                                                          |                                                                             |           |                                                                     |
|------------------------------------------------------------------------------------------------------------------------------------------|-----------------------------------------------------------------------------|-----------|---------------------------------------------------------------------|
| John Jose, MD<br>Vinoi George David, MD (N)                                                                                              | Anu Tharini<br>Anandaroop Lahiri                                            | Vellore   | Christian Medical College (3)                                       |
| Gurpreet S. Wander, MD<br>Rohit Tandon, MD<br>Sarju Ralhan, M.Ch (CTVS)<br>Naved Aslam, DM<br>Abhishek Goyal, DM<br>Vikas Makkar, DM (N) | Baljeet Kaur, MSc (Biotechnology)<br>Sonika Gupta, MBA, B. Pharmacy         | Ludhiana  | Hero DMC Heart Institute, Dayanand Medical College and Hospital (2) |
| S.K. Dwivedi, DM<br>V.S. Narain, DM<br>Sharad Chandra, DM                                                                                | Roma Tewari, PG<br>Meenakshi Mishra, PG<br>Shivali Patel<br>Suman Singh, PG | Lucknow   | King George's Medical University, Department of Cardiology (2)      |
| Johann Christopher, MD<br>Praneeth Polamuri, MD<br>Vikranth Reddy, MD, DNB (N)                                                           | Sowjanya Reddy<br>Manjula Rani                                              | Hyderabad | CARE Hospital (1)                                                   |
| Upendra Kaul, MD                                                                                                                         | Priyadarshani Arambam<br>Bebek Singh                                        | New Delhi | Batra Hospital and Medical Research Centre (BHMRC) (1)              |

### China (70)

Lead Country Cardiologist

Lixin Jiang, MD, PhD

Lead Country Nephrologists

Xuemei Li, MD

|                                                               |                                                                                                |           |                                                              |
|---------------------------------------------------------------|------------------------------------------------------------------------------------------------|-----------|--------------------------------------------------------------|
| Hong Cheng, MD<br>Weijing Bian, MD<br>Guoqin Wang, MD         | Jing Dong, MD<br>Xiaoyi Xu, MD                                                                 | Beijing   | Beijing Anzhen Hospital (24)                                 |
| Jiyan Chen, MD<br>Zhiming Ye, MD (N)                          | Haojian Dong<br>Peiyu He<br>Chunli Xia<br>Junqing Yang<br>Qi Zhong                             | Guangzhou | Guangdong General Hospital (15)                              |
| Xin Fu, MD<br>Zhangsuo Liu, MD (N)                            | Dan Gao<br>Dengke Jiang<br>Ran Leng<br>Xutong Wang<br>Qianqian Yuan<br>Lili Zhang              | Zhengzhou | The First Affiliated Hospital of Zhengzhou University (13)   |
| Shuyang Zhang, MD, PhD<br>Zhenyu Liu, MD<br>Xuemei Li, MD (N) | Ying Wang, MD<br>Yechen Han, MM<br>Lihong Xu, RN<br>Zhenyu Liu<br>Gang Chen, MD<br>Rongrong Hu | Beijing   | Peking Union Medical College Hospital (11)                   |
| Yitong Ma, MD (N)<br>Yining Yang, MD                          | Dongze Li<br>Xiaomei Li<br>Xiang Ma<br>Zixiang Yu<br>Qian Zhao                                 | Urumqi    | First Affiliated Hospital of Xinjiang Medical University (7) |

### Italy (62)

Lead Country Cardiologist

Francesco Orso, MD

|                                                                    |                          |        |                                                  |
|--------------------------------------------------------------------|--------------------------|--------|--------------------------------------------------|
| Carlo Briguori, MD                                                 | Francesca De Micco       | Naples | Clinica Mediterranea (52)                        |
| Gian Piero Perna, MD<br>Marco Marini, MD<br>Gabriele Gabrielli, MD | Francesca Pietrucci, PhD | Ancona | Cardiology and CCU - Ospedali Riuniti Ancona (7) |

|                           |                                            |        |                                                                                              |
|---------------------------|--------------------------------------------|--------|----------------------------------------------------------------------------------------------|
| Mario D'arezzo, MD (N)    |                                            |        |                                                                                              |
| Marco Sicuro, MD          | Gianpiero Leone, MD                        | Aosta  | Ospedale Regionale Umberto Parini (1)                                                        |
| Valentina Pellu, MD (N)   | Francesco Pisano, MD<br>Cristina Bare, BSc |        |                                                                                              |
| Paolo Calabro, MD         | Fabio Fimiani                              | Napoli | AORN Dei Colli "V. Monaldi" UOC Cardiologia<br>Università della Campania "L. Vanvitelli" (1) |
| Tiziana Formisano, MD     |                                            |        |                                                                                              |
| Piero Tassinario, MD (N)  |                                            |        |                                                                                              |
| Marcello Galvani, MD      | Chiara Attanasio                           | Forli  | Ospedale "G.B. Morgagni – L. Pierantoni" Forli<br>(AUSL della Romagna) (1)                   |
| Filippo Ottani, MD        |                                            |        |                                                                                              |
| Marco De Fabritis, MD (N) |                                            |        |                                                                                              |

### Mexico (30)

Lead Country Cardiologist

Jorge Escobedo, MD

Lead Country Nephrologist

Magdalena Madero, MD

|                                    |                          |                 |                                                        |
|------------------------------------|--------------------------|-----------------|--------------------------------------------------------|
| Juan Manuel López Quijano, MD, MSc | Teresa Delgadillo        | San Luis Potosi | Hospital Central Dr. Ignacio Morones Prieto (16)       |
| Alejandro Chevaile Ramos, MD (N)   |                          |                 |                                                        |
| Jorge Carrillo Calvillo, MD        |                          |                 |                                                        |
| Jorge Escobedo, MD                 | Ramon de Jesús-Pérez, RN | Benito Juarez   | Instituto Mexicano del Seguro Social (10)              |
| Rubén Baleón-Espinosa, MD          |                          |                 |                                                        |
| Arturo S Campos-Santaolalla, MD    |                          |                 |                                                        |
| Elihú Durán-Cortés, MD             |                          |                 |                                                        |
| José M Flores-Palacios, MD         |                          |                 |                                                        |
| Andrés García-Rincón, MD           |                          |                 |                                                        |
| Moisés Jiménez-Santos, MD          |                          |                 |                                                        |
| Joaquín V Peñafiel, MD             |                          |                 |                                                        |
| José A Ortega-Ramírez, MD          |                          |                 |                                                        |
| Aquiles Valdespino-Estrada, MD     |                          |                 |                                                        |
| Erick Alexánderson Rosas, MD       | María Pérez García       | Mexico City     | Instituto Nacional de Cardiología "Ignacio Chávez" (2) |
| Magdalena Madero Rovalo, DM (N)    |                          |                 |                                                        |
| Guillermo Garcia-Garcia (N)        | Lorena Lopez, BS         | Guadalajara     | Hospital Civil de Guadalajara Fray Antonio Alcalde (2) |
| Jonathan S. Chavez-Iñiguez         |                          |                 |                                                        |

### Canada (24)

Lead Country Cardiologists

Akshay Bagai, MD, MHS

Kevin R. Bainey, MD, MSc

Lead Country Nephrologist

Ron Wald, MDCM, MPH

|                                       |                                |               |                                |
|---------------------------------------|--------------------------------|---------------|--------------------------------|
| Kevin R. Bainey, MD, MSc              | Norma Hogg, RN                 | Edmonton, AB  | University of Alberta (15)     |
| Neesh Pannu, MD (N)                   | Suzanne Welsh, RN              |               |                                |
| Asim N. Cheema, MD, PhD               | Khrystyna Kushniriuk, HBSc, MD | Toronto, ON   | St. Michael's Hospital (3)     |
| Akshay Bagai, MD, MHS                 | Mohammed Hussain               |               |                                |
| Ron Wald, MDCM, MPH (N)               | Olugbenga Bello                |               |                                |
| Shaun Goodman, MD, MSc                |                                |               |                                |
| John Joseph Graham, MRCP, MB ChB, BSc |                                |               |                                |
| Mark Peterson, MD, FRCSC, PhD         |                                |               |                                |
| Chi-Ming Chow, MD, CM, MSc            |                                |               |                                |
| Beth Abramson, MD, MSc                |                                |               |                                |
| Graham Wong, MD                       | Jackie Chow, BSN               | Vancouver, BC | Vancouver General Hospital (2) |
| Kenneth Gin, MD                       | Andrew Starovoytov, MD         |               |                                |

|                          |                                     |                    |                                                                                                                                  |
|--------------------------|-------------------------------------|--------------------|----------------------------------------------------------------------------------------------------------------------------------|
| Christopher Fordyce, MD  | Naomi Uchida, BSN<br>Ngairé Meadows |                    |                                                                                                                                  |
| Ariel Diaz, MD           | Isabelle Roy, RN                    | Trois-Rivieres, QC | Centre Hospitalier de Regional Trois-Rivieres (1)                                                                                |
| Philippe Rheault, MD     | Patricia Alarie, RN                 |                    |                                                                                                                                  |
| Alejandro Gisbert, MD    | Linda Arcand, RN                    |                    |                                                                                                                                  |
| Alain Raymond, MD        | Estelle Montpetit                   |                    |                                                                                                                                  |
| Yanek Pépin-Dubois, MD   |                                     |                    |                                                                                                                                  |
| Miguel Barrero, MD       |                                     |                    |                                                                                                                                  |
| Carl-Éric Gagné, MD      |                                     |                    |                                                                                                                                  |
| Mark Garand, MD          |                                     |                    |                                                                                                                                  |
| Ricardo Costa, MD        |                                     |                    |                                                                                                                                  |
| Catherine Lemay, MD      |                                     |                    |                                                                                                                                  |
| Ying Tung Sia, MD        |                                     |                    |                                                                                                                                  |
| Pierre Gervais, MD       |                                     |                    |                                                                                                                                  |
| Alain Rheault, MD        |                                     |                    |                                                                                                                                  |
| Pallav Garg, MBBS, MSc   | Sandy Carr, RN                      | London, ON         | London Health Sciences Centre (1)                                                                                                |
| Matthew Weir, MD (N)     | Catherine Bone, RN                  |                    |                                                                                                                                  |
| Amar Uxa, MD             | Nadia Asif                          | Toronto, ON        | University Health Network (1)                                                                                                    |
| Michael Farkouh, MD      |                                     |                    |                                                                                                                                  |
| Christopher Chan, MD (N) | Suzana Tavares                      |                    |                                                                                                                                  |
| Philippe Généreux, MD    | Chantale Mercure, RN                | Montréal, QC       | Centre Intégré Universitaire De Santé et de Services Sociaux du Nord de l'île de Montréal /Hôpital du Scaré-Cœur de Montréal (1) |
| Jean Diodati, MD         |                                     |                    |                                                                                                                                  |
| François Madore, MD (N)  |                                     |                    |                                                                                                                                  |

#### Singapore (14)

Lead Country Cardiologist  
Kian-Keong Poh, MD  
Lead Country Nephrologist  
Titus Lau, MD

|                         |                     |           |                                                 |
|-------------------------|---------------------|-----------|-------------------------------------------------|
| Kian-Keong Poh, MD      |                     | Singapore | National University Heart Center Singapore (11) |
| Ping Chai, MD           |                     |           |                                                 |
| Titus Lau, MD (N)       |                     |           |                                                 |
| Joshua P. Loh, MD       |                     |           |                                                 |
| Edgar L. Tay, MD        |                     |           |                                                 |
| Kristine Teoh, MD       | Sik-Yin V Tan, BSc  |           |                                                 |
| Lynette L. Teo, MD      | Winnie C Sia, BSc   |           |                                                 |
| Ching-Ching Ong, MD     | Audrey W Leong, BSc |           |                                                 |
| Raymond C. Wong, MD     |                     |           |                                                 |
| Poay-Huan Loh, MD       |                     |           |                                                 |
| Theodoros Kofidis, MD   |                     |           |                                                 |
| David Foo, MBBS         | Li Hai Yan, RN      | Singapore | Tan Tock Seng Hospital (2)                      |
| Jason Loh Kwok Kong, MD |                     |           |                                                 |
| Ching Min Er, MD        |                     |           |                                                 |
| Fahim Haider Jafary, MD |                     |           |                                                 |
| Tracy Tan, MD (N)       |                     |           |                                                 |
| Terrance Chua, MD       | Nasrul Ismail       | Singapore | National Heart Centre Singapore (1)             |
|                         | Min Tun Kyaw        |           |                                                 |
|                         | Deborah Yip         |           |                                                 |

#### Brazil (13)

Lead Country Cardiologist  
Renato D. Lopes, MD, PhD  
Lead Country Nephrologists  
Maria Eugenia Canziani, MD (Lead)

Sergio Draibe, MD (Co-Lead)

|                                                                                                                                                                                                                                          |                                                                                                                                 |              |                                                        |
|------------------------------------------------------------------------------------------------------------------------------------------------------------------------------------------------------------------------------------------|---------------------------------------------------------------------------------------------------------------------------------|--------------|--------------------------------------------------------|
| Whady Hueb, MD<br>Eduardo Gomes Lima, MD<br>Paulo Cury Rezende, MD<br>Expedito Eustáquio Ribeiro<br>Silva, MD<br>Alexandre Ciappina Hueb, MD                                                                                             | Myrthes Emy Takiuti, RN                                                                                                         | Sao Paulo    | Heart Institute (InCor) University of São Paulo<br>(6) |
| Marianna D. A. Dracoulakis, MD,<br>PhD<br>Rodolfo G. S. D Lima, MD<br>Paulo Novis Rocha, MD (N)                                                                                                                                          | Natalia S Oliveira, RN                                                                                                          | Salvador     | Hospital da Bahia (5)                                  |
| Alexandre Schaan de Quadros,<br>MD<br>Renato Abdala Karam Kalil, MD<br>José Luiz da Costa Vieira, MD<br>Gabriel Grossmann, MD<br>Pedro Piccaro de Oliveira, MD<br>Leonardo Bridi, MD<br>Simone Savaris, MD<br>Renato George Eick, MD (N) | Aline Peixoto Deiro<br>Alicia Manica Muller<br>Maria Antonieta Pereira de Moraes<br>Bruna Maria Ascoli<br>Sílvia Zottis Poletti | Porto Alegre | Instituto de Cardiologia de Porto Alegre (1)           |
| Paola Emanuela Poggio<br>Smanio, MD, PhD<br>Leda Lotaif, MD, PhD (N)                                                                                                                                                                     | Leonardo Pizzol Caetano, PhD                                                                                                    | São Paulo    | Instituto Dante Pazzanese de Cardiologia (1)           |

#### Hungary (12)

Lead Country Cardiologist

Andras Vertes, MD

Lead Country Nephrologist

Peter Voros, MD

|                                                       |                                                                  |          |                                                         |
|-------------------------------------------------------|------------------------------------------------------------------|----------|---------------------------------------------------------|
| Andras Vertes, MD<br>Peter Voros, MD (N)              | Judit Sebo, MD<br>Zoltan Davidovits, MD<br>Laszlone Matics       | Budapest | Eszszk- Szent Istvan Hospital (10)                      |
| Bela Merkely, MD, PhD, DSc<br>Mihaly Tapolyai, MD (N) | Andrea Bartykowszki, MD<br>Pal Maurovich-Horvat, MD, PhD,<br>MPH | Budapest | Heart and Vascular Center, Semmelweis<br>University (1) |
| Albert Varga, MD, PhD<br>Timea Boros, MD (N)          | Gergely Ágoston, MD                                              | Szeged   | University of Szeged (1)                                |

#### Lithuania (12)

Lead Country Cardiologist

Jelena Celutkiene, MD

Lead Country Nephrologist

Marius Miglinas, MD, PhD

|                                                                                 |                                                                                                                                                                                                   |         |                                                        |
|---------------------------------------------------------------------------------|---------------------------------------------------------------------------------------------------------------------------------------------------------------------------------------------------|---------|--------------------------------------------------------|
| Aleksandras Laucevicius, MD<br>Jelena Celutkiene, MD<br>Marius Miglinas, MD (N) | Agne Juceviciene, MD<br>Irma Kalibataite-Rutkauskiene, MD<br>Laura Keinaite<br>Monika Laukyte<br>Gelmina Mikolaitiene<br>Akvile Smigelskaite, MD<br>Ilona Tamasauskiene, MD<br>Agne Urboniene, MD | Vilnius | Vilnius University Hospital Santariskes Clinic<br>(12) |
|---------------------------------------------------------------------------------|---------------------------------------------------------------------------------------------------------------------------------------------------------------------------------------------------|---------|--------------------------------------------------------|

#### Portugal (10)

Lead Country Cardiologist

Ruben Ramos, MD

Lead Country Nephrologist

Fernando Nolasco, PhD

|                                                                                  |                                                 |        |                                                        |
|----------------------------------------------------------------------------------|-------------------------------------------------|--------|--------------------------------------------------------|
| Ruben Ramos, MD<br>Duarte Cacela, MD<br>Ana Santana, MD<br>Antonio Fiarresga, MD | Mafalda Selas<br>Filipa Silva<br>Cláudia Freixo | Lisbon | Hospital de Santa Marta / Hospital Curry Cabral<br>(8) |
|----------------------------------------------------------------------------------|-------------------------------------------------|--------|--------------------------------------------------------|

Lidia Sousa, MD  
 Hugo Marques, MD  
 Lino Patricio, MD  
 Luis Bernardes, MD  
 Pedro Rio, MD  
 Ramiro Carvalho, MD  
 Rui Ferreira, MD  
 Tiago Silva, MD  
 Ines Rodrigues, MD  
 Pedro Modas, MD  
 Guilherme Portugal, MD  
 Jose Fragata, MD  
 Marina Vieira, MD  
 Fernando Nolasco, PhD (N)  
 Fernando Caeiro, MD

|                                |                                   |         |                                                                  |
|--------------------------------|-----------------------------------|---------|------------------------------------------------------------------|
| Pedro Farto e Abreu, MD        | Maura Carina Nédio, BSc           | Amadora | Hospital Professor Doutor Fernando Fonseca, EPE (1)              |
| Sérgio Bravo Baptista, MD, PhD |                                   |         |                                                                  |
| Miguel Borges Santos, MD       |                                   |         |                                                                  |
| Patricia Carrilho, MD (N)      |                                   |         |                                                                  |
| Fausto J. Pinto, PhD           | Inês Zimbarra Cabrita, PhD        | Lisbon  | Santa Maria University Hospital, Cardiology Department, CHLN (1) |
| Miguel Nobre Menezes, MD       | Andreia Rocha, MSc                |         |                                                                  |
| Guilhermina Cantinho Lopes, MD | Francisca Patuleia Figueiras, PhD |         |                                                                  |
| Ana Gomes Almeida, PhD         | Andreia Coelho, BSc               |         |                                                                  |
| Pedro Canas Silva, MD          | Marta Capinha                     |         |                                                                  |
| Angelo Nobre, MD               | Maria Inês Caetano                |         |                                                                  |
| Ana Rita Francisco, MD         | Susana Silva                      |         |                                                                  |
| Jose Lopes, MD (N)             |                                   |         |                                                                  |

**Spain (9)**

Lead Country Cardiologist  
 Almudena Castro, MD  
 Lead Country Nephrologist  
 Rafael Selgas, MD

|                                 |                                   |          |                                                                                                                                                      |
|---------------------------------|-----------------------------------|----------|------------------------------------------------------------------------------------------------------------------------------------------------------|
| Jose Lopez-Sendon, MD, PhD      | Virginia Fernández-Figares, Pharm | Madrid   | Hospital La Paz. IdiPaz (6)                                                                                                                          |
| Almudena Castro, MD             |                                   |          |                                                                                                                                                      |
| Elena Refoyo Salicio, MD        |                                   |          |                                                                                                                                                      |
| Gabriela Guzman, MD             |                                   |          |                                                                                                                                                      |
| Gabriel Galeote, MD             |                                   |          |                                                                                                                                                      |
| Silvia Valbuena, MD             |                                   |          |                                                                                                                                                      |
| Rafael Selgas, MD (N)           |                                   |          |                                                                                                                                                      |
| Jesús Peteiro, MD, PhD          | Moisés Blanco-Calvo, PhD          | A Coruna | Complejo Hospitalario Universitario A Coruña (CHUAC) Sergas, Department of Cardiology. INIBIC A Coruña. CIBER-CV. Universidad de A Coruña, Spain (2) |
| María Dolores Martínez-Ruiz, MD | Encarnación Alonso-Álvarez, BSc   |          |                                                                                                                                                      |
| Ruth Pérez-Fernández, MD        | Paula García-González, BSc        |          |                                                                                                                                                      |
| José J Cuenca-Castillo, MD      |                                   |          |                                                                                                                                                      |
| Xacobe Flores-Ríos, MD          |                                   |          |                                                                                                                                                      |
| Óscar Prada-Delgado, MD         |                                   |          |                                                                                                                                                      |
| Gonzalo Barge-Caballero, MD     |                                   |          |                                                                                                                                                      |
| Miguel Perez Fontan, MD (N)     |                                   |          |                                                                                                                                                      |
| Vicente Miro, MD                | Begoña Igual, MD                  | Valencia | Hospital Universitario y Politecnico La Fe (1)                                                                                                       |
| Jose L Diez, MD                 |                                   |          |                                                                                                                                                      |
| Pilar Calvillo, MD              |                                   |          |                                                                                                                                                      |
| Julio Hernandez Jaras, MD (N)   |                                   |          |                                                                                                                                                      |

**Argentina (6)**

Lead Country Cardiologist

Luis Guzman, MD  
Lead Country Nephrologist  
Rafael Maldonado, MD

|                                               |                    |         |                                     |
|-----------------------------------------------|--------------------|---------|-------------------------------------|
| Mariano Rubio, MD<br>Rafael Maldonado, MD (N) | Graciela Scaro, MD | Cordoba | Clínica Privada Vélez Sarsfield (5) |
|-----------------------------------------------|--------------------|---------|-------------------------------------|

|                                                                                                                        |                      |                                 |                        |
|------------------------------------------------------------------------------------------------------------------------|----------------------|---------------------------------|------------------------|
| Julio César Figal, MD<br>Oscar Méndiz, MD<br>Claudia Cortés, MD<br>Roberto René Favalaro, MD<br>Pablo Raffaele, MD (N) | Matías Nicolás Mungo | Ciudad Autónoma de Buenos Aires | Fundación Favalaro (1) |
|------------------------------------------------------------------------------------------------------------------------|----------------------|---------------------------------|------------------------|

**France (6)**

Lead Country Cardiologist  
Emmanuel Sorbets, MD, PhD  
Lead Country Nephrologist  
Eric Daugas, MD, PhD

|                                                                                                               |                                            |       |                     |
|---------------------------------------------------------------------------------------------------------------|--------------------------------------------|-------|---------------------|
| Philippe Gabriel Steg, MD<br>Jean-Michel Juliard, MD<br>Eric Daugas, MD, PhD (N)<br>Emmanuel Sorbets, MD, PhD | Helene Abergel, MSc<br>Axelle Fuentes, MSc | Paris | Bichat Hospital (4) |
|---------------------------------------------------------------------------------------------------------------|--------------------------------------------|-------|---------------------|

|                                                                                                        |                                                                                            |          |                        |
|--------------------------------------------------------------------------------------------------------|--------------------------------------------------------------------------------------------|----------|------------------------|
| Christophe Thuaire, MD<br>Téodora Dutoiu, MD<br>Catherine Albert, MD (N)<br>Bougrida Hammouche, MD (N) | Corine Thobois, RN<br>Emilie Tachot, RN<br>Christophe Laure, RN<br>Christel Vassaliere, RN | Chartres | C.H. Louis Pasteur (2) |
|--------------------------------------------------------------------------------------------------------|--------------------------------------------------------------------------------------------|----------|------------------------|

**New Zealand (6)**

Lead Country Cardiologist  
Gerard Patrick Devlin, MD  
Lead Country Nephrologist  
Peter Sizeland, MD

|                                                                          |                                                           |          |                      |
|--------------------------------------------------------------------------|-----------------------------------------------------------|----------|----------------------|
| Gerard Patrick Devlin, MD<br>Raewyn Fisher, MD<br>Peter Sizeland, MD (N) | Liz Low, RN<br>Jayne Scales, RN<br>Kirsty Abercrombie, RN | Hamilton | Waikato Hospital (6) |
|--------------------------------------------------------------------------|-----------------------------------------------------------|----------|----------------------|

**United Kingdom (5)**

Lead Country Nephrologist  
David Wheeler, MD

|                                                                                                                                                                                                                                                                                                                                   |                                                                                                                                                                                                                                                                                    |        |                                                                    |
|-----------------------------------------------------------------------------------------------------------------------------------------------------------------------------------------------------------------------------------------------------------------------------------------------------------------------------------|------------------------------------------------------------------------------------------------------------------------------------------------------------------------------------------------------------------------------------------------------------------------------------|--------|--------------------------------------------------------------------|
| Roxy Senior, MBBS, MD, DM<br>Ahmed Elghamaz, MB BCH<br>Sothinathan Gurunathan, MBChB<br>Nikolaos Karogiannis, MBBS<br>Benoy N Shah, MD, MBBS, BSc (Hons)<br>Richard HJ Trimlett, MBBS, CCST<br>Michael B Rubens, LRCP, MRCS, MBBS, DMRD<br>Edward D Nicol, MD, BMedSci, MBBS, DTM&H<br>Tarun K Mittal, MD<br>Neill Duncan, MD (N) | Grace M. Young, MSc, BSc (Hons)<br>Christopher Kinsey<br>Raisa Kavalakkat, MSc, BSc, RN<br>Jo Evans, RN<br>Ikraam Hassan, RN<br>Emma Howard, MSc, BSc<br>Ann Banfield, BSc, RN<br>Reinette Hampson, BSc (Hons), BA (Hons)<br>Rory Collins, BSc<br>Anastasia Vamvakidou, MBBS, MRCP | Harrow | Northwick Park Hospital Harrow/ Royal Brompton Hospital London (2) |
|-----------------------------------------------------------------------------------------------------------------------------------------------------------------------------------------------------------------------------------------------------------------------------------------------------------------------------------|------------------------------------------------------------------------------------------------------------------------------------------------------------------------------------------------------------------------------------------------------------------------------------|--------|--------------------------------------------------------------------|

|                                                           |                                                         |            |                         |
|-----------------------------------------------------------|---------------------------------------------------------|------------|-------------------------|
| Reto Andreas Gamma, MBBS<br>Sumith Abeygunasekara, MD (N) | Sarah Williams, RN<br>Kim Holland, RN<br>Karen Swan, RN | Chelmsford | Broomfield Hospital (1) |
|-----------------------------------------------------------|---------------------------------------------------------|------------|-------------------------|

|                                                 |                                                                       |        |                                            |
|-------------------------------------------------|-----------------------------------------------------------------------|--------|--------------------------------------------|
| Khaled Alfakih, MBBS, MD<br>Jonathan Byrne, PhD | Abigail Knighton, BSc., PG Dip.<br>Katherine Martin, RGN, Dip. N, MSc | London | King's College NHS Foundation Hospital (1) |
|-------------------------------------------------|-----------------------------------------------------------------------|--------|--------------------------------------------|



Ian Webb, PhD, MA (N)

---

|                         |                              |           |                           |
|-------------------------|------------------------------|-----------|---------------------------|
| Dwayne S. G. Conway, MD | Judith Wright<br>Donna Exley | Wakefield | Pinderfields Hospital (1) |
|-------------------------|------------------------------|-----------|---------------------------|

---

**Serbia (5)**

Lead Country Cardiologist  
Branko D. Beleslin, MD, PhD  
Lead Country Cardiologist  
Sanja Simic Ogrizovic, MD

|                             |                                  |          |                                                                                                  |
|-----------------------------|----------------------------------|----------|--------------------------------------------------------------------------------------------------|
| Branko D. Beleslin, MD, PhD |                                  | Belgrade | Faculty of Medicine, University of Belgrade;<br>Cardiology Clinic, Clinical Center of Serbia (5) |
| Nikola N. Boskovic, MD      | Ana D. Djordjevic-Dikic, MD, PhD |          |                                                                                                  |
| Marija T. Petrovic, MD      | Vojislav L. Giga, MD, PhD        |          |                                                                                                  |
| Milan R. Dobric, MD         | Jelena J. Stepanovic, MD, PhD    |          |                                                                                                  |
| Zeljko Z. Markovic, MD, PhD |                                  |          |                                                                                                  |
| Ana S. Mladenovic, MD, PhD  |                                  |          |                                                                                                  |
| Sanja Ogrizovic, MD (N)     |                                  |          |                                                                                                  |

**Australia (4)**

Lead Country Cardiologist  
Joseph B. Selvanayagam, MBBS (Hons), Dphil  
Lead Country Cardiologist  
Magid Fahim, MBChB, FRACP

|                                              |                   |          |                                                                          |
|----------------------------------------------|-------------------|----------|--------------------------------------------------------------------------|
| Joseph B. Selvanayagam,<br>MBBS(Hons), DPhil | Sau Lee, PhD      | Adelaide | Flinders Medical Centre and College of<br>Medicine and Public Health (4) |
| Majo X. Joseph, MBBS                         | Prince Thomas, RN |          |                                                                          |
| Jonathan M Gleadle, BM Dphil<br>(N)          |                   |          |                                                                          |

**Austria (4)**

Lead Country Cardiologist  
Herwig Schuchlenz

|                       |                    |      |                           |
|-----------------------|--------------------|------|---------------------------|
| Herwig Schuchlenz, MD | Gudrun Steinmaurer | Graz | LKH Graz West Austria (3) |
| Stefan Weikl, MD      |                    |      |                           |

---

|                       |                     |        |                                                               |
|-----------------------|---------------------|--------|---------------------------------------------------------------|
| Irene Marthe Lang, MD | Max-Paul Winter, MD | Vienna | Medical University of Vienna, Department of<br>Cardiology (1) |
|-----------------------|---------------------|--------|---------------------------------------------------------------|

**Belgium (4)**

Lead Country Nephrologist  
Kathleen Claes, MD, PhD

|                             |                 |        |                                |
|-----------------------------|-----------------|--------|--------------------------------|
| Kaatje Goetschalckx, MD     | Valerie Robesyn | Leuven | University Hospital Leuven (3) |
| Frans Van de Werf, PhD, MD  |                 |        |                                |
| Kathleen Claes, MD, PhD (N) |                 |        |                                |

---

|                                     |                  |        |                                       |
|-------------------------------------|------------------|--------|---------------------------------------|
| Christiaan Vrints, MD               | Nathalie Brosens | Edegem | Universitair Ziekenhuis Antwerpen (1) |
| Bharati Shivalkar, MD               |                  |        |                                       |
| Amaryllis Van Craenenbroeck, MD (N) |                  |        |                                       |

**Israel (4)**

|                        |                   |          |                                      |
|------------------------|-------------------|----------|--------------------------------------|
| Yaron Arbel, MD        | Daniela Puzhevsky | Tel Aviv | Tel Aviv Sourasky Medical Center (4) |
| Doron Schwartz, MD (N) | Miri Revivo       |          |                                      |
| Orit Kliuk, MD         |                   |          |                                      |

**Egypt (3)**

|                      |                  |       |                      |
|----------------------|------------------|-------|----------------------|
| Magdy Abdelhamid, MD | Ahmed Talaat, MD | Cairo | Cairo University (3) |
|----------------------|------------------|-------|----------------------|

|                                                                       |                                                                                                                                                                                             |                                                                                                   |           |                                         |
|-----------------------------------------------------------------------|---------------------------------------------------------------------------------------------------------------------------------------------------------------------------------------------|---------------------------------------------------------------------------------------------------|-----------|-----------------------------------------|
|                                                                       | Ahmed Kamal, MsC<br>Hossam Mahrous, MD<br>Mohamed Adel , MsC<br>Hussien El Fishawy, MD (N)                                                                                                  |                                                                                                   |           |                                         |
| <b>United Arab Emirates (2)</b>                                       | Wael A. Almahmeed, MD<br>Mohamed Hassan, MD (N)<br>Seema Nour, MD<br>Abdallah M. Abdallah, MD<br>Salamah Alfalahi, MD                                                                       | Virendra Misra, MD                                                                                | Abu Dhabi | Sheikh Khalifa Medical City (2)         |
| <b>Germany (1)</b><br>Lead Country Cardiologist<br>Rolf Doerr, MD     | Rolf Doerr, MD<br>Gregor Simonis, MD, PhD<br>Juergen Stumpf, MD<br>Clemens T. Kadalie, MD<br>Klaus Matschke, MD, PhD<br>Doreen Reimann, MD (N)                                              | Karin Ploetze, PhD<br>Franziska Guenther<br>Kerstin Bonin<br>Kerstin Mikes, RN<br>Katharina Knaut | Dresden   | Praxisklinik Herz und Gefaesse (1)      |
| <b>Macedonia (1)</b>                                                  | Sasko Kedev, MD, PhD<br>Irena Peovska Mitevaska, MD,<br>PhD<br>Elizabeta Srbinovska Kostovska, MD, PhD<br>Hristo Pejkov, MD, PhD<br>Zvezdana Petronijevic, MD (N)<br>Liljana Tozija, MD (N) |                                                                                                   | Skopje    | University Clinic of Cardiology (1)     |
| <b>Netherlands (1)</b>                                                | Robert K. Riezebos, MD, PhD<br>Pouneh Samadi, MD<br>Elise van Dongen, MD<br>Sander R. Niehe, MD<br>Yves Smets, MD (N)                                                                       | Jeannette, J. M. Schoep, RN<br>Elisabeth, M. Janzen, RN                                           | Amsterdam | Cardio Research Hartcentrum OLVG (1)    |
| <b>Romania (1)</b>                                                    | Calin Pop, MD, PhD<br>Matei Claudia, MD, PhD<br>Florina Chereches, MD (N)                                                                                                                   |                                                                                                   | Bucharest | Emergency County Hospital Baia Mare (1) |
| <b>Sweden (1)</b><br>Lead Country Cardiologist<br>Claes Held, MD, PhD | Claes Held, MD, PhD<br>Axel Åkerblom, MD, PhD<br>Inga Soveri, MD, PhD (N)                                                                                                                   | Christina Björklund, RN<br>Maria Andreasson, RN                                                   | Uppsala   | Uppsala University (1)                  |

\* (N) = Nephrologist
